# Supplementary material
Source: PubMed Central journal article supplement (PMC4060733)
Supplement: supp_agu006_agu006supp.pdf [file supp_agu006_agu006supp.pdf]

### Animal Weight Data in Grams

|               | Saline-H2O | EtOH-H2O | Saline-LiCl | EtOH-LiCl |
|---------------|------------|----------|-------------|-----------|
| <b>Day 0</b>  | 24.5       | 24       | 25.1        | 24.6      |
| <b>Day 6</b>  |            |          | 24.1        | 23.5      |
| <b>Day 13</b> |            |          | 24.9        | 24.525    |
| <b>Day 21</b> | 25.9       | 25.2     | 25.7        | 24.4125   |
